# Supplementary material for: Novel approach for a cerium-based highly-efficient catalyst with excellent NH3-SCR performance
Source: Royal Society of Chemistry journal article supplement (doi:10.1039/c4cy00926f), 2014-01-01
Supplement: c4cy00926f1.pdf [file c4cy00926f1.pdf]

Supplementary Material (ESI) for Catalysis Science & Technology  
This journal is (c) The Royal Society of Chemistry 2014

## **Novel Approach for a Cerium-Base High-Efficient Catalyst with Excellent NH<sub>3</sub>-SCR Performance**

Haili Huang, Wenpo Shan\*, Shijian Yang, and Jinhua Zhang

School of Environmental and Biological Engineering, Nanjing University of Science and  
Technology, Nanjing 210094, PR China

\*Corresponding author. Tel: 86-18012920637; Fax: 86-25-84315173;  
E-mail address: wenposhan@hotmail.com

Electronic Supplementary Information

### **Preparation of V<sub>2</sub>O<sub>5</sub>-WO<sub>3</sub>/TiO<sub>2</sub>, Mn/TiO<sub>2</sub> and Cu-SAPO-34 catalysts**

In order to comprehensively evaluate the activity of CeO<sub>2</sub>/WO<sub>3</sub>-TiO<sub>2</sub> catalyst in this study, V<sub>2</sub>O<sub>5</sub>-WO<sub>3</sub>/TiO<sub>2</sub> with 1 wt.% V<sub>2</sub>O<sub>5</sub> and 10 wt.% WO<sub>3</sub>, Mn/TiO<sub>2</sub> with 10 wt.% MnO<sub>2</sub>, and Cu-SAPO-34 catalysts with a Cu loading of 1.258 wt.% were prepared as reference materials.

The V<sub>2</sub>O<sub>5</sub>-WO<sub>3</sub>/TiO<sub>2</sub> catalyst was prepared by conventional impregnation method using NH<sub>4</sub>VO<sub>3</sub> and (NH<sub>4</sub>)<sub>10</sub>W<sub>12</sub>O<sub>41</sub> as precursors, H<sub>2</sub>C<sub>2</sub>O<sub>4</sub>·2H<sub>2</sub>O as solubility promoter, and TiO<sub>2</sub> as support. After impregnation, the excess water was removed in a rotary evaporator at 60 °C. The sample was dried at 100 °C overnight and then calcined at 500 °C for 5h in air condition.

The Mn/TiO<sub>2</sub> catalyst was also prepared by conventional impregnation method using Mn(NO<sub>3</sub>)<sub>2</sub> as precursor and TiO<sub>2</sub> as support. After impregnation, the excess water was removed in a rotary evaporator at 60 °C. The sample was dried at 100 °C overnight and then calcined at 500 °C for 5h in air condition.

The Cu-SAPO-34 catalyst was prepared by liquid ion-exchange method using CuSO<sub>4</sub>·5H<sub>2</sub>O and H-SAPO-34 as precursors. H-SAPO-34 was firstly ion exchanged using a NH<sub>4</sub>NO<sub>3</sub> solution at 80 °C for 3 h to obtain NH<sub>4</sub>-SAPO-34. Then, Cu ion-exchange was performed by mixing the NH<sub>4</sub>-SAPO-34 with a CuSO<sub>4</sub>·5H<sub>2</sub>O solution (0.1 mol/L) at 60 °C for 3 h. The solids were collected by filtration and then washed

with distilled water, dried at 100 °C for 12 h and calcinated at 550 °C for 5 h, orderly.

## **Characterizations**

The surface areas of the catalysts were obtained from N<sub>2</sub> adsorption/desorption analysis at -196 °C using a Micromeritics ASAP 2020. Prior to the N<sub>2</sub> physisorption, the catalysts were degassed at 300 °C for 4 h. Surface areas were determined by BET equation in 0.05-0.35 partial pressure range.

Powder X-ray diffraction (XRD) measurements of the samples were carried out on a computerized Bruker-AXS D8 diffractometer with Cu K $\alpha$  ( $\lambda = 0.15406$  nm) radiation. The data of  $2\theta$  from 20 to 80 ° were collected at 8 °/min with the step size of 0.07 °.

The XPS data were obtained on a Scanning X-ray Microprobe (ESCALAB 250, Thermo-VG Scientific) using Al K $\alpha$  radiation (1486.7 eV). Binding energies of Ce 3d, Ti 2p and O 1s were calibrated using C 1s peak (BE = 284.8 eV) as standard.

The H<sub>2</sub>-TPR tests were carried out on a Micromeritics AutoChem\_II\_2920 chemisorption analyzer. The samples (100 mg) in a quartz reactor were pretreated at 400 °C in a flow of air (50 mL/min) for 1 h and cooled down to room temperature. Then H<sub>2</sub>-TPR was performed in 10 vol % H<sub>2</sub>/Ar gas flow of 50 mL/min at a heating rate of 10 °C/min.

The photos of the samples (in Fig. 1) were taken with a digital camera under the same lighting condition (natural light), at the same time. The surface morphology and elemental composition of the samples were studied using a scanning electron microscope (SEM, FEI Quanta 250F) combined with an energy dispersive X-ray (EDX) attachment. The accelerating voltage was 9.0 kV.

The NO<sub>x</sub>-TPD was performed using the same reactor as activity tests. A typical experiment used 300 mg sample and a gas flow rate of 200 mL/min. The experiment consisted of four stages: (1) degasification of the catalyst under N<sub>2</sub> at 350 °C for 1 h, (2) adsorption of 500 ppm NO and 5 vol.% O<sub>2</sub> at 50 °C for 1 h, (3) isothermal desorption under N<sub>2</sub> at 50 °C, and (4) temperature-programmed desorption under N<sub>2</sub> at 10 °C/min up to 500 °C.

## SEM-EDX

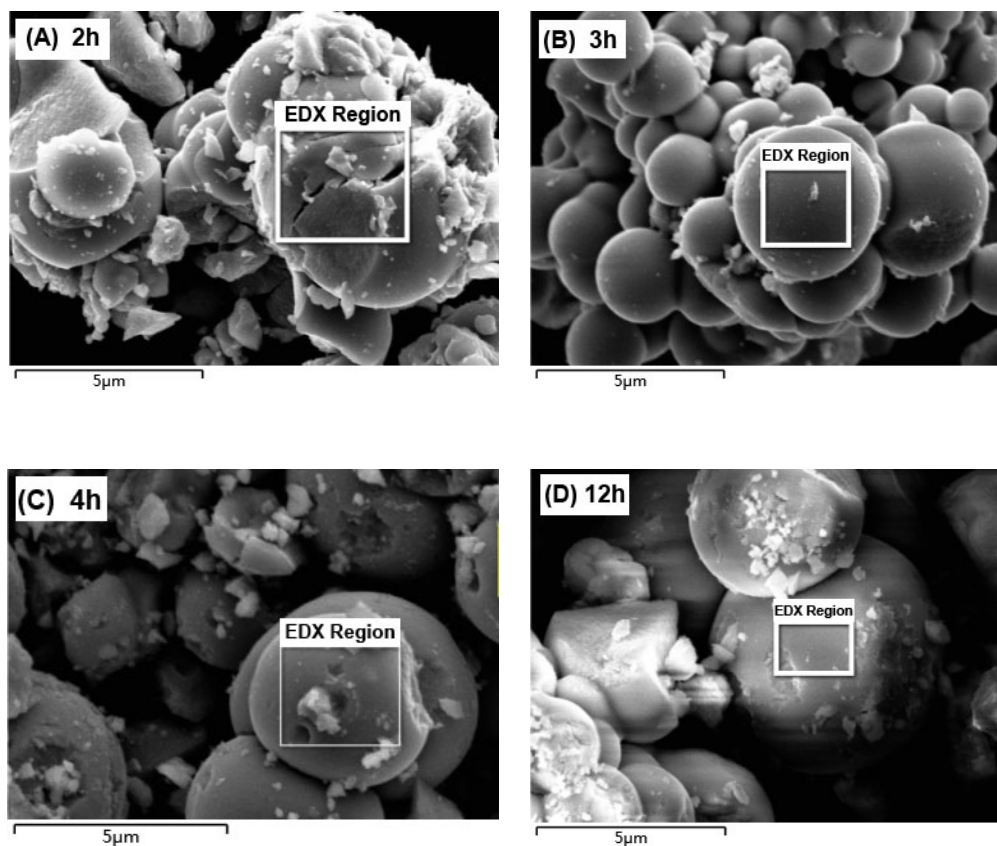

**Fig. S1** SEM images and the selected regions for EDX tests of the samples with different precipitation time.

Figure S1 shows the SEM images of the samples with different precipitation time, as well as the selected regions for EDX tests. There was no obvious difference of the samples in the SEM images. All samples consisted of spherical particles with diameters varying from 1 to 5 μm. However, the EDX analysis showed a gradually increase of Ce atomic concentration with precipitation time, which confirmed the proposed formation process of the  $\text{CeO}_2/\text{WO}_3\text{-TiO}_2$  catalyst (see the main text).

## XRD patterns

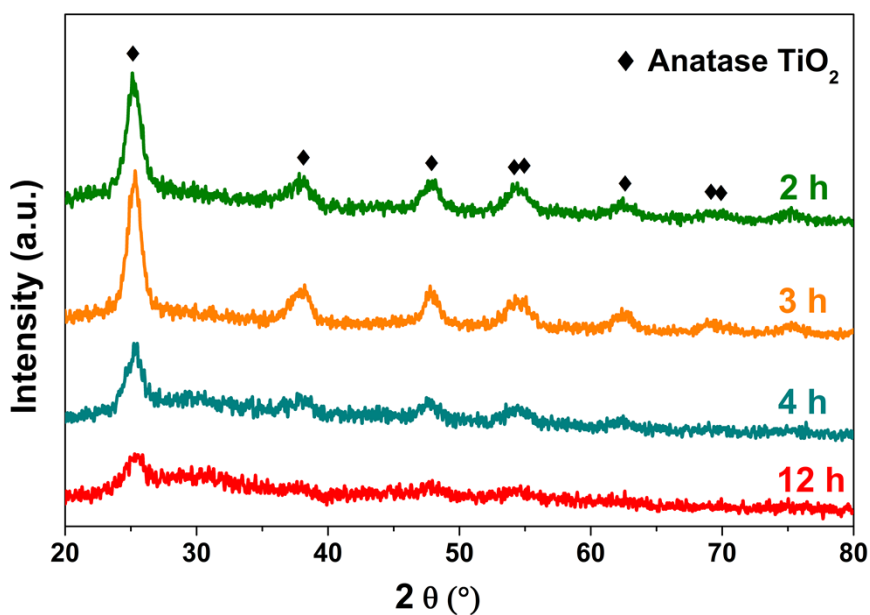

Fig. S2 XRD patterns of the samples with different precipitation time.

The description of Fig. S2 was already shown in the main text.

### H<sub>2</sub>-TPR

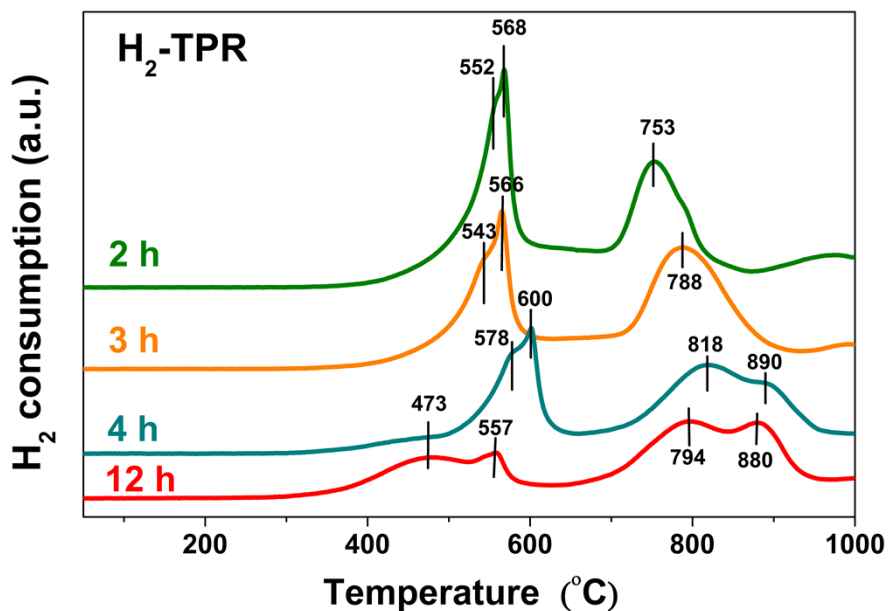

Fig. S3 H<sub>2</sub>-TPR profiles of the samples with different precipitation time.

The H<sub>2</sub>-TPR profiles of the samples are presented in Fig. S3. The H<sub>2</sub>-TPR traces for the samples of 2 h and 3 h reflect multi-stage reduction process from WO<sub>3</sub> to WO<sub>2</sub>

via two non-stoichiometric  $\text{WO}_x$  oxides with three peaks at 552/543, 568/566 and 753/788 °C, respectively.<sup>S1-S3</sup> Two TPR peaks appeared at 473 and 890/880 °C, respectively, after the addition of Ce species on the samples of 4 h and 12 h. The peaks at 473 °C can be attributed to the reduction of surface  $\text{Ce}^{4+}$  to  $\text{Ce}^{3+}$ , while the peaks at 890/880 °C might be assigned to the reduction of bulk  $\text{CeO}_2$ .<sup>S2-S6</sup> The  $\text{H}_2$ -TPR profiles strongly suggest an enhancement of redox property (a very important property for the  $\text{NH}_3$ -SCR reactivity in the low-temperature region) by the Ce species on the catalyst.

#### **$\text{NH}_3$ conversion over the samples with different precipitation time.**

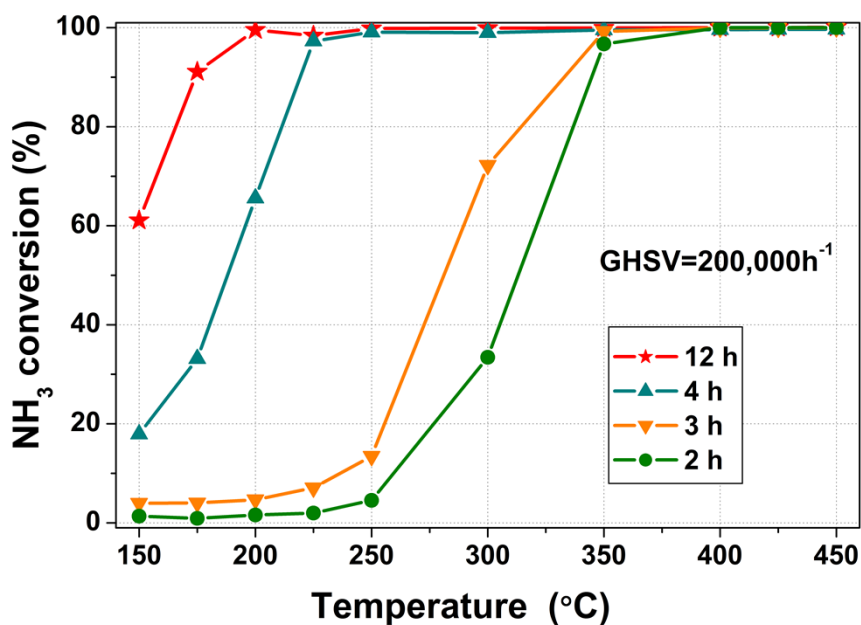

**Fig. S4**  $\text{NH}_3$  conversion over the samples with different precipitation time. Reaction conditions:  $[\text{NO}] = [\text{NH}_3] = 500$  ppm,  $[\text{O}_2] = 5$  vol.%, balance  $\text{N}_2$  and GHSV = 200,000 h<sup>-1</sup>.

The description of Fig. S4 was already shown in the main text.

### N<sub>2</sub>O production over the samples with different precipitation time.

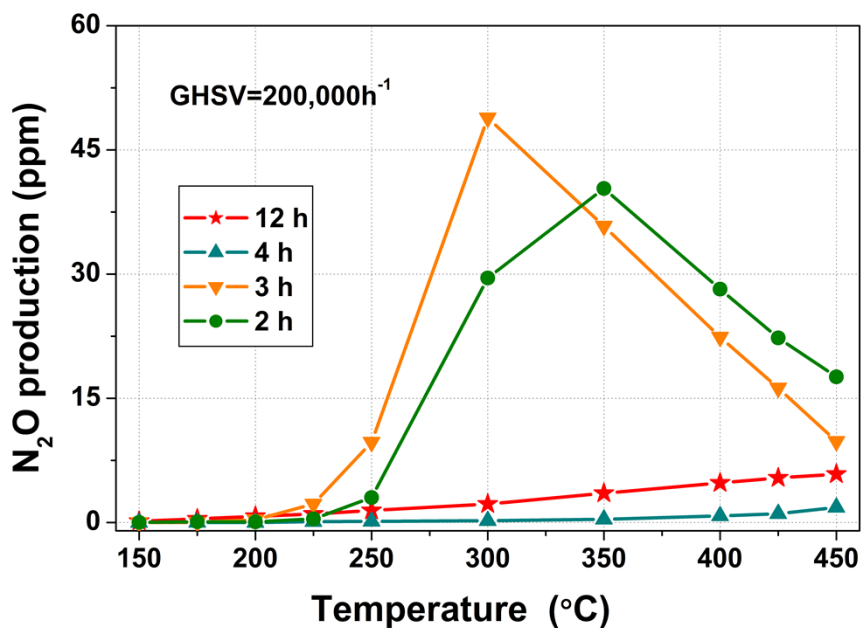

Fig. S5 N<sub>2</sub>O concentrations over the samples with different precipitation time.

Reaction conditions: [NO] = [NH<sub>3</sub>] = 500 ppm, [O<sub>2</sub>] = 5 vol.%, balance N<sub>2</sub> and GHSV = 200,000 h<sup>-1</sup>.

The description of Fig. S5 was already shown in the main text.

### Influences of H<sub>2</sub>O and CO<sub>2</sub>

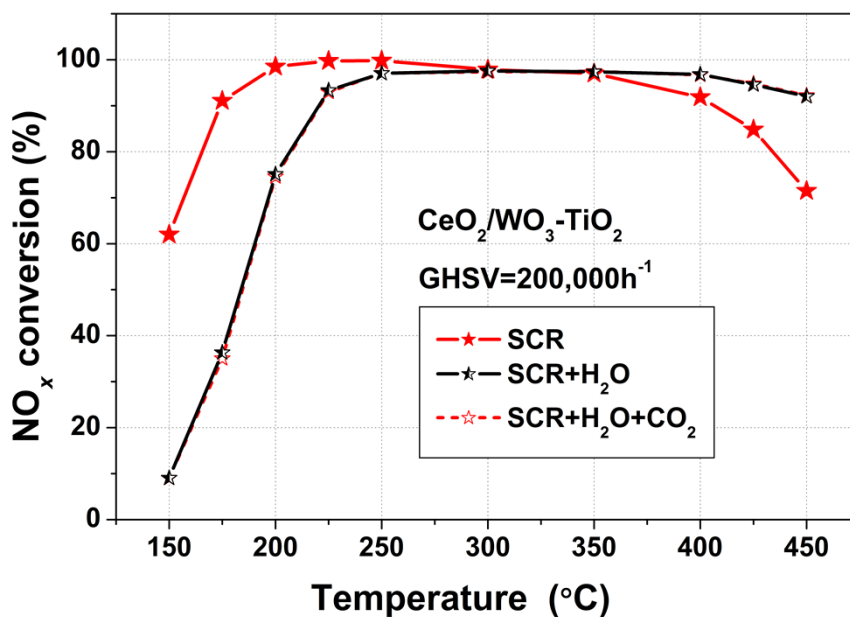

Fig. S6 Influences of H<sub>2</sub>O and CO<sub>2</sub> on the NO<sub>x</sub> conversion over CeO<sub>2</sub>/WO<sub>3</sub>-TiO<sub>2</sub>

catalyst. Reaction conditions:  $[\text{NO}] = [\text{NH}_3] = 500$  ppm,  $[\text{O}_2] = 5$  vol.%,  $[\text{H}_2\text{O}] = 5$  vol.% (when used),  $[\text{CO}_2] = 5$  vol.% (when used), balance  $\text{N}_2$  and GHSV = 200,000 h<sup>-1</sup>.

The effects of  $\text{H}_2\text{O}$  and  $\text{CO}_2$  on  $\text{NO}_x$  conversion over the  $\text{CeO}_2/\text{WO}_3\text{-TiO}_2$  catalyst were tested under a GHSV of 200,000 h<sup>-1</sup> (Fig. S6). The existence of 5%  $\text{H}_2\text{O}$  induced a decrease of low temperature activity while an enhancement of high temperature activity. Over 90%  $\text{NO}_x$  conversion could still be obtained from 225 to 450 °C (Fig S6). The  $\text{NO}_x$  conversion under the coexistence of 5 %  $\text{CO}_2$  and 5 %  $\text{H}_2\text{O}$  was almost the same as that with only 5 %  $\text{H}_2\text{O}$  in the feeding gas, suggesting that no synergistic inhibition effect between  $\text{CO}_2$  and  $\text{H}_2\text{O}$  was present on the SCR activity.

## References

- S1 Z. Ma, D. Weng, X. Wu, Z. Si, and B. Wang, *Catal. Commun.*, 2012, **27**, 97.
- S2 A. Sim, N.W. Cant, and D.L. Trimm, *Int. J. Hydrogen Energ.*, 2010, **35**, 8953.
- S3 D.G. Barton, S.L. Soled, G.D. Meitzner, G.A. Fuentes, and E. Iglesia, *J. Catal.*, 1999, **181**, 57.
- S4 L. Chen, J. Li and M. Ge, *J. Phys. Chem. C*, 2009, **113**, 21177.
- S5 Z. Liu, S. Zhang, J. Li, and L. Ma, *Appl. Catal., B*, 2014, **144**, 90.
- S6 K.J. Li, M.S. Maqbool, P.A. Kumar, K.H. Song, and H.P. Ha, *Catal. Lett.*, 2013, **143**, 988.
